# Supplementary material for: Production of furfural from xylose catalyzed by a novel calcium gluconate derived carbon solid acid in 1,4-dioxane
Source: Royal Society of Chemistry journal article supplement (doi:10.1039/d0nj00619j), 2020-01-01
Supplement: d0nj00619j1.pdf [file d0nj00619j1.pdf]

## Supplementary Information

### Production of furfural from xylose catalyzed by a novel calcium gluconate derived carbon solid acid in 1,4-dioxane

Tao Yang,<sup>a</sup> Wenzhi Li,<sup>\*ab</sup> Mingxue Su,<sup>a</sup> Yang Liu,<sup>a</sup> Minghou Liu<sup>c</sup>

*a: Laboratory of Basic Research in Biomass Conversion and Utilization, Department of Thermal Science and Energy Engineering, University of Science and Technology of China, Hefei 230026, P. R. China; b: National Synchrotron Radiation Laboratory, University of Science and Technology of China, Hefei 230026, P. R. China; c Department of Thermal Science and Energy Engineering, University of Science and Technology of China, Hefei 230026, P. R. China.*

*Corresponding author: liwenzhi@ustc.edu.cn*

Table S1 The elemental analysis of fresh and used catalyst

| Entry                        | S contents (%) | SO <sub>3</sub> H density <sup>a</sup> (mmol/g) |
|------------------------------|----------------|-------------------------------------------------|
| SC-GCa-600                   | 3.072          | 0.96                                            |
| SC-GGa-700                   | 3.776          | 1.18                                            |
| SC-GCa-800                   | 4.256          | 1.33                                            |
| Used SC-GCa-800 <sup>b</sup> | 3.201          | 1.00                                            |

<sup>b</sup> the 5<sup>th</sup> recycling SC-GCa-800 catalyst

Table S2 Furfural production from xylose using various catalysts

| Catalyst     | Solvent        | Reaction conditions | Furfural yield (%) | References |
|--------------|----------------|---------------------|--------------------|------------|
| SC-GCa-800   | 1,4-dioxane    | 140 °C, 40 min      | 76.9               | This work  |
| S-RFC        | GVL            | 170 °C, 15 min      | 80                 | 33         |
| PTSA-POM     | GVL            | 170 °C, 10 min      | 80.4               | 43         |
| S-DP         | Water/CPME     | 200 °C, 50 min      | 76                 | 44         |
| TPA          | Water/Toluene  | 190 °C, 180 min     | 70.9               | 45         |
| Ionic liquid | Water/butanone | 150 °C, 30 min      | 60                 | 30         |

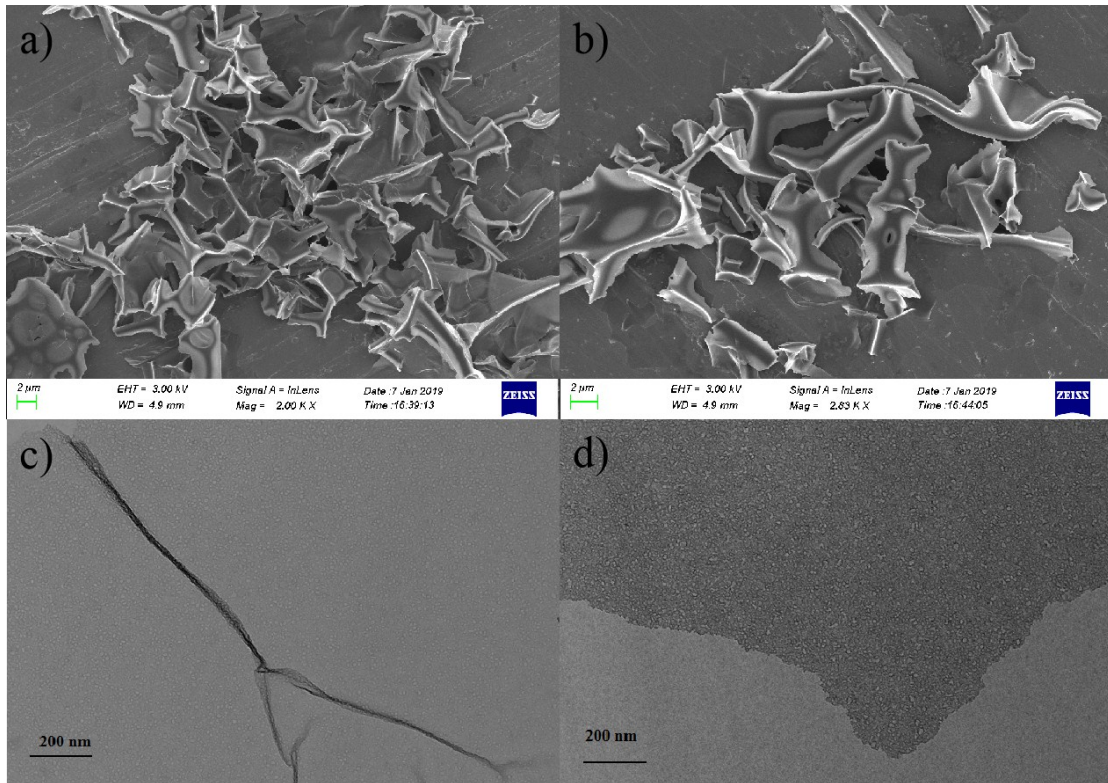

Fig. S1. SEM images of C-GCa-800 (a) , SC-GCa-800 (b) and TEM images of C-GCa-800 (c) , SC-GCa-800 (d)

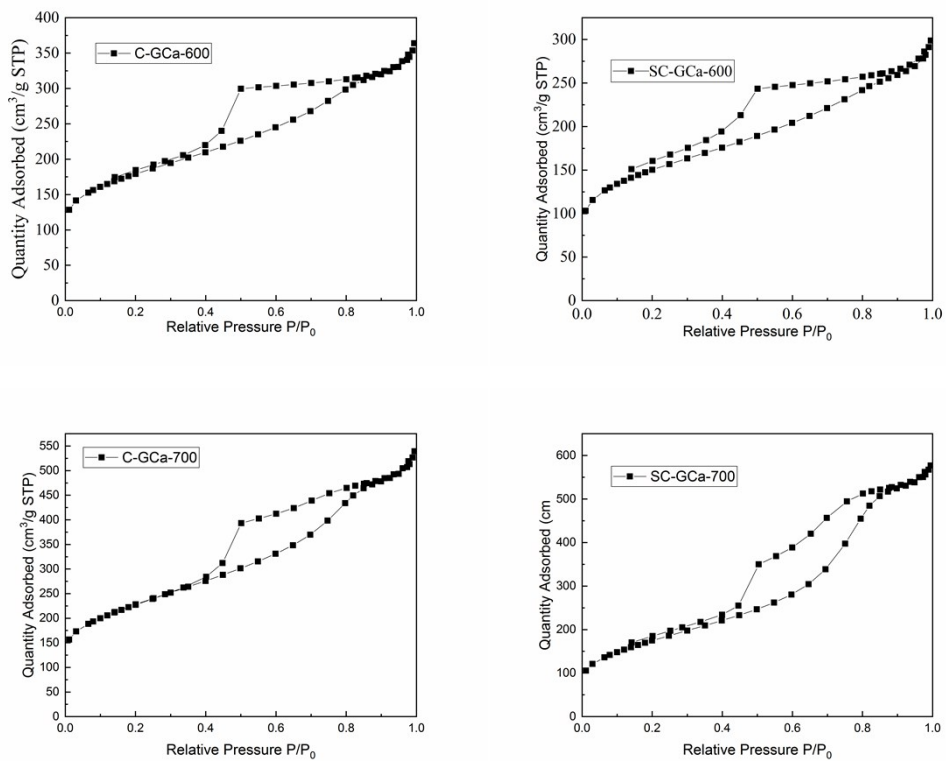

Fig.S2 N<sub>2</sub> adsorption/desorption isotherms of a) C-GCa-600, b) SC-GCa-600, c) C-GCa-

700 and d) SC-GCa-700.

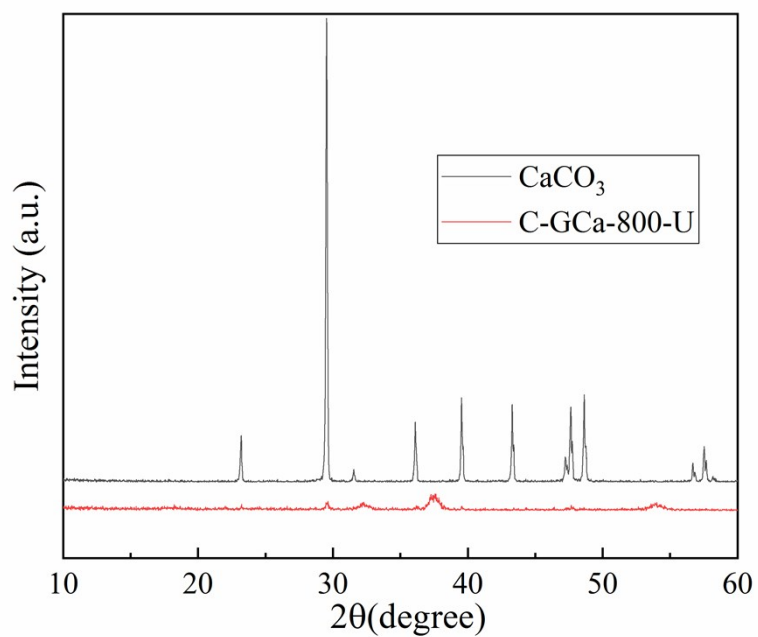

Fig. S3 XRD patterns obtained for CaCO<sub>3</sub> and C-GCa-800 untreated with HCl (C-GCa-800-U)

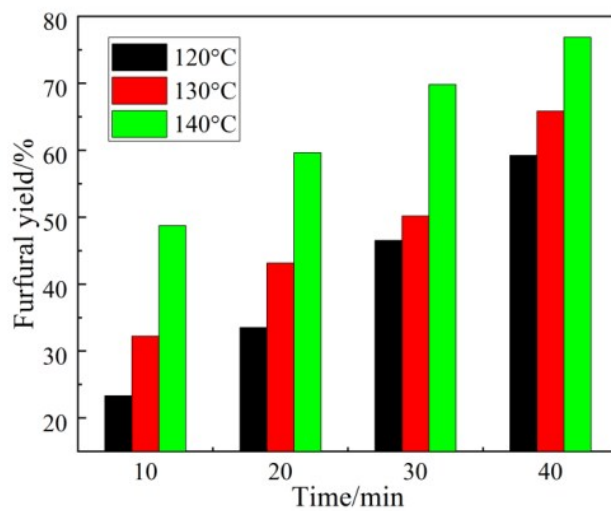

Fig. S4 Effects of reaction temperature (120-140 °C) and residence time (10-40 min). Reaction conditions: 5 mL 1,4-dioxane, 50 mg catalyst, 100 mg xylose.

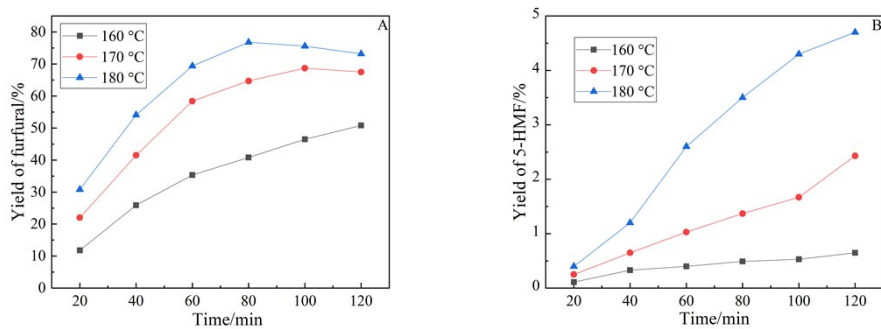

Fig. S5 Furfural production from corn stover. Reaction conditions: 15 mL 1,4-dioxane, 100 mg SC-GCa-800, 200 mg corn stover.

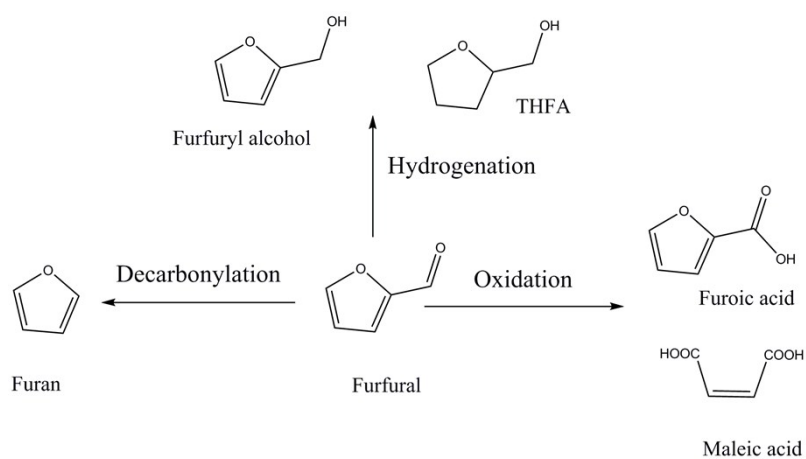

Scheme S1. Conversion of furfural to various valued chemicals.

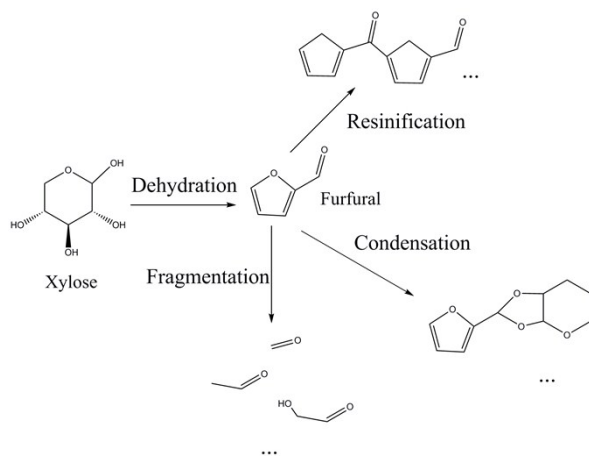

Scheme S2. Xylose dehydration to furfural and some plausible side reactions in the process.
